# Supplementary material for: Reproductive tract complication risks following Chlamydia trachomatis infections: a long-term prospective cohort study from 2008 to 2022
Source: PubMed Central journal article supplement — Lancet Reg Health Eur. 2024 Aug 17;45:101027. doi: 10.1016/j.lanepe.2024.101027 (PMC11378087; doi:10.1016/j.lanepe.2024.101027), 2024-08-17
Supplement: mmc2.pdf [file mmc2.pdf]

## Supplementary materials - Table of contents

| Content                            | Title                                                                 | Page    |
|------------------------------------|-----------------------------------------------------------------------|---------|
| <i><b>Figures</b></i>              |                                                                       |         |
| Figure S1                          | Study inclusion flowchart                                             | 2       |
| Figure S2                          | Retention of participants                                             | 3       |
| Figure S3                          | Flowchart medical registry check                                      | 4       |
| <i><b>Detailed information</b></i> |                                                                       |         |
| Box S1                             | Details of response and loss-to-follow up                             | 5       |
| Box S2                             | Details of medical register validation                                | 6       |
| References                         | References                                                            | 7       |
| <i><b>Tables</b></i>               |                                                                       |         |
| Table S1                           | Medical registry check outcomes                                       | 8       |
| Table S2                           | Potential confounders                                                 | 9       |
| Table S3                           | Characteristics of the study population by chlamydia status           | 10 – 12 |
| Table S4                           | Characteristics of the study population by imputation status          | 13 – 15 |
| Table S5                           | Characteristics of the study population by diagnosis status           | 16 – 18 |
| Table S6                           | Characteristics of the study population by symptoms status            | 19 – 21 |
| Table S7                           | Sensitivity analysis pelvic inflammatory disease                      | 22      |
| Table S8                           | Association between stratified chlamydia positivity and complications | 23 – 24 |
| Table S9                           | Sensitivity analysis chlamydia screening-PCR and self-reported        | 25      |
| Table S10                          | Sensitivity analysis without chlamydia serology+ only                 | 26      |
| Table S11                          | Risk estimates for potential confounders in models with chlamydia     | 27 - 28 |
| Table S12                          | Risk estimates for confounders included in final multivariable models | 29 - 30 |

**Figure S1 - Study inclusion flowchart**

Details are described in Box S1.

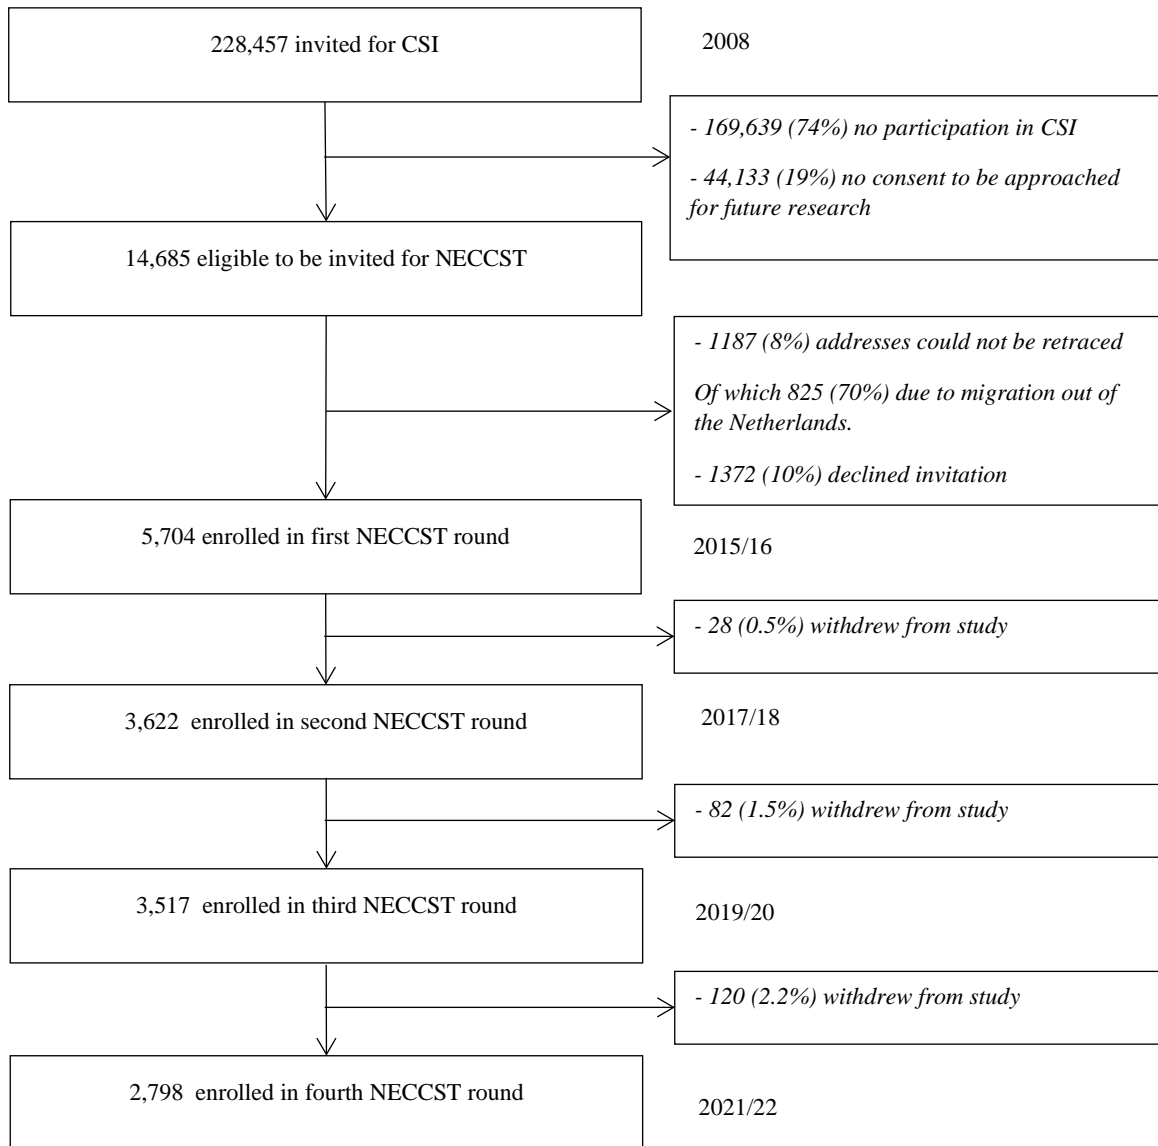

CSI = Chlamydia Screening Implementation. NECCST = Netherlands Chlamydia Cohort Study.

**Figure S2 - Retention of participants**

In first round, second round, third round and fourth round of NECCST cohort. Grey boxes indicate (partial) loss to follow up. Details are described in Box S1.

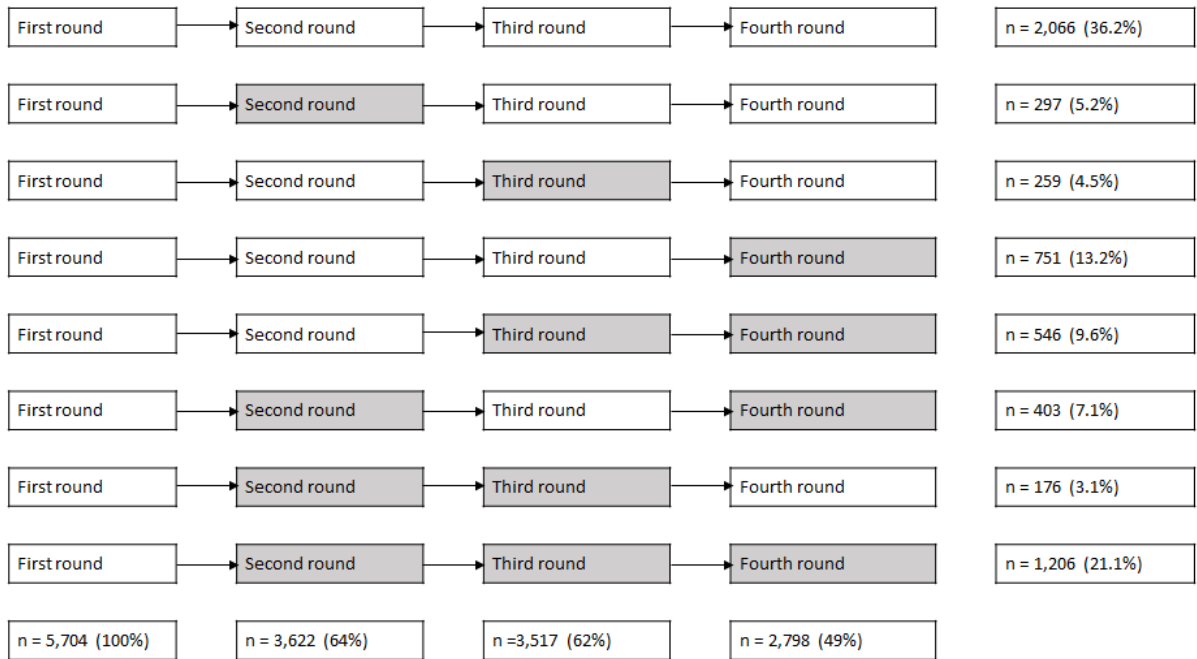

**Figure S3 - Flowchart medical registry check**

Details are described in Box S2.

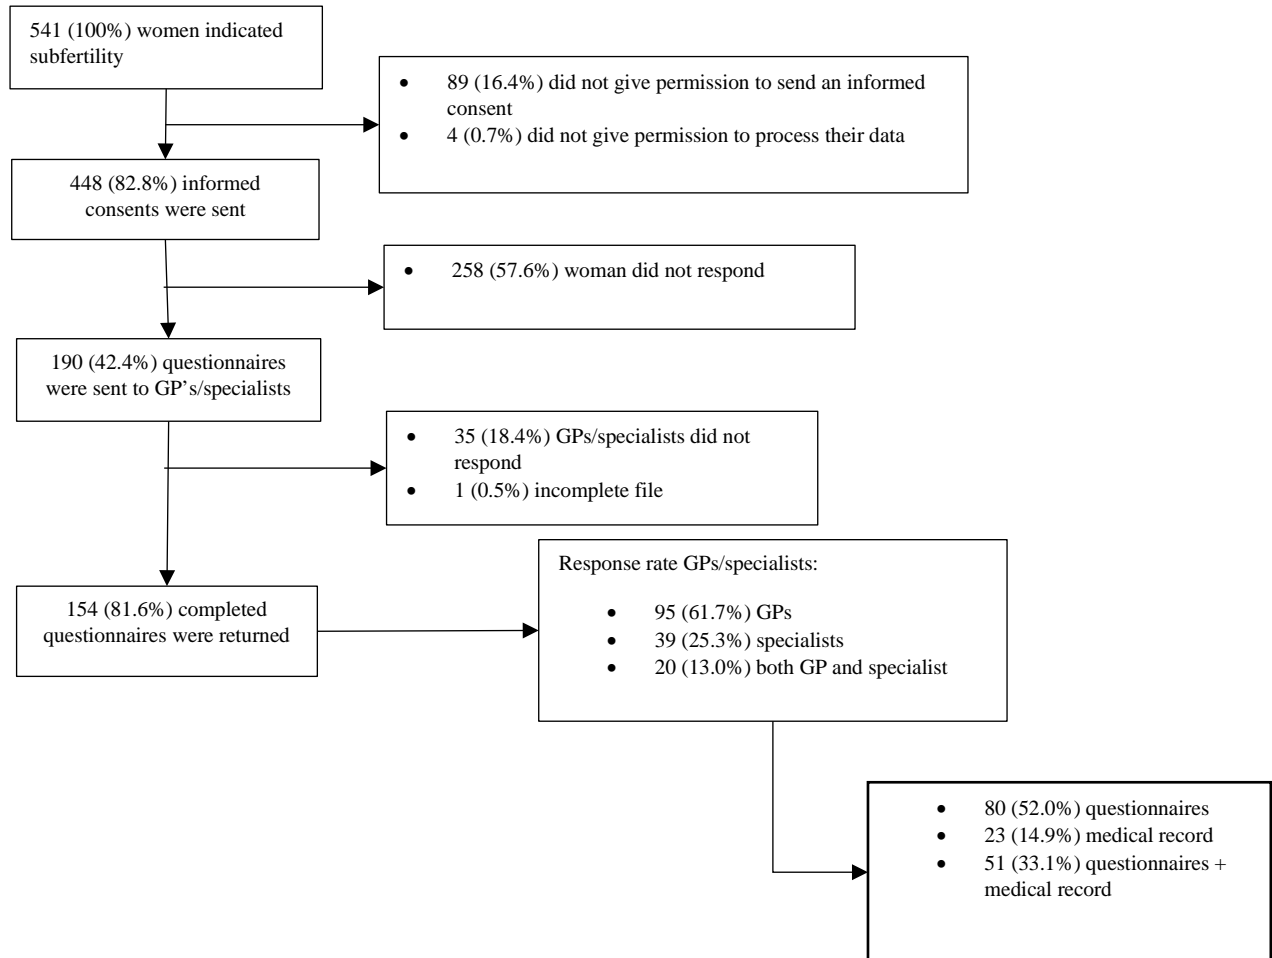

### **Box S1 - Details of response and loss-to-follow up**

All women, whether chlamydia-positive or chlamydia-negative, who were invited to participate in NECCST were from the same population. Of the total women from the general population sample invited for CSI (n=228,457), 26% (n=58,818) engaged in the CSI at least once. Women that were enrolled in CSI compared to the general population were more often of Non-Western migration background and had more often a theoretical education background. Behavioral factors associated with participation were having no long-standing relationship and reported history or symptoms of sexually transmitted infections (1).

From the female CSI participants, 14,685 (6%) granted consent to be considered for future STI research, making them eligible for NECCST (figure S1). Within NECCST, 5704 women (38.8%) participated, as depicted in Figure S1. The NECCST cohort, totaling 5704 women, encompassed both those with and without prior chlamydia infections. Women that were enrolled in NECCST compared to non-respondents more often had a theoretical education, were more often Dutch and had less lifetime or recent sex partners.

NECCST comprised four data-collection rounds. All women who participated in the first round were invited to join the second, third, and fourth rounds, regardless of their participation in previous rounds. Participation rates were 63.5% (3,622 women) in the second round, 61.7% (3,517 women) in the third round, and 49.1% (2,798 women) in the final round (see Figure S1).

A total of 2,066 women (36.2%) participated in all four rounds, while 1,206 women (21.1%) participated only in the first round. Approximately 23% (n=1,307) of women participated in three rounds, and 19.7% (n=1,125) participated in two rounds (see Figure S2). Determinants associated with study retention included younger age, higher education, Western migration background, absence of previous chlamydia infections, fewer lifetime partners, and a greater number of previous chlamydia tests (regardless of outcome). Across all subsequent NECCST rounds after the initial round, women without chlamydia infection at baseline were significantly more likely to participate compared to the first round alone: first round 65.9%, second round 72.0%, third round 72.8%, and fourth round 72.5%, respectively.

## Box S2 – Details of medical register validation

An accurate TFI diagnosis needs invasive medical examinations. All women who self-reported subfertility were asked which fertility examinations had been conducted, i.e. chlamydia antibody testing (CAT), hysterosalpingography (HSG), contrast ultrasonography, laparoscopy or ‘none of the above’. Furthermore they were asked about the cause of subfertility i.e. tubal pathology, endometriosis, ovulatory dysfunction, surgery/removal of ovaries, fallopian tubes and/or uterus, unexplained or other. Those who reported subfertility due to only male factor were not asked further questions about examinations and causes.

To test the validity of a self-reported TFI diagnosis, we asked all women that reported in the questionnaire to be sub fertile if we could verify this in their medical record at either the GP or medical (fertility) specialist. In total, 541 (9.5%) women reported to be sub fertile and were asked if we could contact them for informed consent for medical registry insight. Eventually 448 (82.8%) informed consent files including information letters were sent. Forty-two percent signed the informed consent forms for the medical record request. Eventually, 154 (34.4%) files were used to validate self-reported answers in medical records (Figure S3). Healthcare providers could either provide the information in a questionnaire or send relevant parts of the electronic patient record.

In this study the validity between self-reported causes of subfertility and medical records data was assessed from all four rounds of NECCST. The validity of overall subfertility was high as 86.4% was validated from medical record data. A substantial level of agreement ( $\kappa = 0.72$ ) was found in our study for tubal subfertility (Table S1). This was comparable with results from a cohort study by de Boer et al. that assessed the validity of self-reported data on causes of subfertility (2). They found a kappa value of 0.79 for tubal subfertility, which they classified as ‘excellent agreement’.

There was possible under-reporting of TFI cases due to misclassification of participants in our study. Of the self-reported TFI cases that we could not validate in the medical record, 33.3% had “removal of the ovaries or fallopian tubes” as cause of subfertility in the medical record. A possible reason for removal of fallopian tubes could be hydrosalpinx or extra-uterine gravidity. In this case, participants did not end up in the medical record TFI group, but may belong to it. But we can also not exclude these cases are unrelated to TFI. Especially for removal of the ovaries which is more often related to endometriosis, cysts or (increased risk of) ovarian cancer.

Under-reporting of TFI was also found for participants that had TFI as cause of subfertility in the medical record, but did not self-reported it. Of these participants, 40.0% reported “removal of the ovaries or fallopian tubes” in the online questionnaire. It could be that participants were not aware of anatomical differences between for example ovaries or fallopian tubes. In this case participants did not end up in the self-reported TFI group, but probably did belong to it. Considering this, we regard 0.72 to be an acceptable agreement.

## References

1. Op de Coul EL, Gotz HM, van Bergen JE, Fennema JS, Hoebe CJ, Koekenbier RH, et al. Demographic and behavioral correlates of participation and positivity in the Dutch Chlamydia screening: Who participates? *Sex Transm Dis.* 2012;39(2):97-103.
2. de Boer EJ, den Tonkelaar I, Burger CW, van Leeuwen FE, Group OP. Self-reported causes of subfertility: Validity assessment. *Am J Epidemiol.* 2005;161(10):978-86.

**Table S1 - Medical registry check outcomes**

Comparison for subfertility and its causes between self-reported data and medical data from GPs or specialists for women for whom the medical record could be retrieved (n=154). For each women each cause of subfertility was analyzed independently and therefore combinations were not taken into account.

Self-reported (+) indicating that specific cause was self-reported, self-reported (-) indicating that specific cause was not self-reported. Medical record (+) indicating that specific cause was documented in medical records, medical record (-) indicating that specific cause was not documented in medical records. # only women with at least one self-reported cause of subfertility were included in the analysis.

|                                             | Subfertility cause Self-reported (+) |                    | Subfertility cause Self-reported (-) |                    | Validity                      |                 |                 | Reliability   |             |
|---------------------------------------------|--------------------------------------|--------------------|--------------------------------------|--------------------|-------------------------------|-----------------|-----------------|---------------|-------------|
|                                             | Medical record (+)                   | Medical record (-) | Medical record (+)                   | Medical record (-) | Positive predictive value (%) | Sensitivity (%) | Specificity (%) | Agreement (%) | Kappa value |
| Subfertility                                | 133                                  | 21                 | -#                                   | -#                 | 86.4                          | -               | -               | -             | -           |
| Causes                                      |                                      |                    |                                      |                    |                               |                 |                 |               |             |
| Tubal pathology                             | 12                                   | 3                  | 5                                    | 134                | 80.0                          | 70.6            | 97.8            | 94.8          | 0.72        |
| Endometriosis                               | 5                                    | 3                  | 8                                    | 138                | 62.5                          | 38.5            | 97.9            | 92.9          | 0.44        |
| Ovulatory dysfunction                       | 71                                   | 45                 | 11                                   | 27                 | 61.2                          | 86.6            | 37.5            | 63.6          | 0.25        |
| Surgery/Removal of ovaries, fallopian tubes | 2                                    | 11                 | 3                                    | 138                | 15.4                          | 40.0            | 92.6            | 90.9          | 0.18        |
| Other                                       | 6                                    | 34                 | 10                                   | 104                | 15.0                          | 37.5            | 75.4            | 71.4          | 0.08        |
| Unexplained                                 | 3                                    | -                  | 25                                   | 126                | 100                           | 10.7            | 100             | 83.7          | 0.16        |



**Table S2 – Potential confounders**

Overview of variables collected from NECCST participants assessed as potential confounders

| variable                       | timing                 | data source           | definition                                | class       | categories                                                                                                                                                                            |
|--------------------------------|------------------------|-----------------------|-------------------------------------------|-------------|---------------------------------------------------------------------------------------------------------------------------------------------------------------------------------------|
| gonorrhea diagnosis            | time-varying           | self-reported         | recorded by calendar year                 | categorical | yes/no                                                                                                                                                                                |
| IUD insertion                  | time-varying           | self-reported         | recorded by calendar year                 | categorical | yes/no                                                                                                                                                                                |
| age                            | sexual debut           | self-reported         | at sexual debut                           | continuous  |                                                                                                                                                                                       |
| condom use with casual partner | NECCST study inclusion | self-reported         | last 12 months                            | categorical | always, mostly/ sometimes/ never or not often/ no casual partners                                                                                                                     |
| smoking                        | NECCST study inclusion | self-reported         | lifetime                                  | categorical | daily/ yes, but not continuously/ never                                                                                                                                               |
| BMI                            | NECCST study inclusion | self-reported         |                                           | categorical | <25/ 25-30/ >30                                                                                                                                                                       |
| number of chlamydia tests      | NECCST study inclusion | self-reported         | lifetime                                  | categorical | 1-2/ 3-5/ ≥6                                                                                                                                                                          |
| number of sex partners         | NECCST study inclusion | self-reported         | lifetime                                  | categorical | <6/ 6-12/ >12                                                                                                                                                                         |
| education level                | NECCST study inclusion | self-reported         | highest completed                         | categorical | theoretical (higher professional education, university level education)/ practical (all other education)                                                                              |
| migration background           | NECCST study inclusion | population registries | based on country of birth of both parents | categorical | Western (Dutch, Western Non-Dutch (incl. West European countries, Australia, North America, Indonesia and Japan))/ non-Western (Marocco and Turkey, SAN, other Non-western countries) |

IUD = intratuterine device, SAN = SAN: Suriname, Aruba and the former Dutch Antilles

**Table S3 - Characteristics of the study population by chlamydia status**

Overall and stratified by chlamydia status at last data collection

|                                          | Overall, N = 5,704 <sup>1</sup> | Chlamydia-negative, N = 3,691 <sup>1</sup> | Chlamydia-positive, N = 2,013 <sup>1</sup> | p-value <sup>2</sup> |
|------------------------------------------|---------------------------------|--------------------------------------------|--------------------------------------------|----------------------|
| <b>Age (years) mean (SD)<sup>#</sup></b> | 35.28 (4.45)                    | 35.46 (4.42)                               | 34.95 (4.50)                               | <0.001               |
| <b>Chlamydia status<sup>#</sup></b>      |                                 |                                            |                                            |                      |
| CT negative                              | 3,691 (65%)                     | 3,691 (100%)                               | 0 (0%)                                     |                      |
| Self-reported + screening-PCR            | 230 (4.0%)                      | 0 (0%)                                     | 230 (11%)                                  |                      |
| Self-reported + screening-PCR + CT-IgG   | 112 (2.0%)                      | 0 (0%)                                     | 112 (5.6%)                                 |                      |
| Self-reported + CT-IgG                   | 350 (6.1%)                      | 0 (0%)                                     | 350 (17%)                                  |                      |
| Self-reported only                       | 868 (15%)                       | 0 (0%)                                     | 868 (43%)                                  |                      |
| Screening-PCR + CT-IgG                   | 1 (<0.1%)                       | 0 (0%)                                     | 1 (<0.1%)                                  |                      |
| Screening-PCR only                       | 3 (<0.1%)                       | 0 (0%)                                     | 3 (0.1%)                                   |                      |
| CT-IgG only                              | 449 (7.9%)                      | 0 (0%)                                     | 449 (22%)                                  |                      |
| <b>Migration background</b>              |                                 |                                            |                                            | <0.001               |
| Non-western                              | 869 (15%)                       | 410 (11%)                                  | 459 (23%)                                  |                      |
| Western                                  | 4,565 (80%)                     | 3,121 (85%)                                | 1,444 (72%)                                |                      |
| Unknown                                  | 270 (4.7%)                      | 160 (4.3%)                                 | 110 (5.5%)                                 |                      |
| <b>Educational level<sup>§</sup></b>     |                                 |                                            |                                            | <0.001               |
| Practical                                | 1,163 (20%)                     | 603 (16%)                                  | 560 (28%)                                  |                      |
| Theoretical                              | 4,539 (80%)                     | 3,088 (84%)                                | 1,451 (72%)                                |                      |
| Unknown                                  | 2 (<0.1%)                       | 0 (0%)                                     | 2 (<0.1%)                                  |                      |
| <b>Smoking (lifetime)</b>                |                                 |                                            |                                            | <0.001               |
| Daily                                    | 525 (9.2%)                      | 267 (7.2%)                                 | 258 (13%)                                  |                      |
| Yes, but not continuously                | 2,919 (51%)                     | 1,819 (49%)                                | 1,100 (55%)                                |                      |
| Never                                    | 2,260 (40%)                     | 1,605 (43%)                                | 655 (33%)                                  |                      |
| <b>BMI</b>                               |                                 |                                            |                                            | 0.002                |
| <25                                      | 4,322 (76%)                     | 2,849 (77%)                                | 1,473 (73%)                                |                      |
| 25-30                                    | 939 (16%)                       | 587 (16%)                                  | 352 (17%)                                  |                      |
| >30                                      | 431 (7.6%)                      | 249 (6.7%)                                 | 182 (9.0%)                                 |                      |
| Unknown                                  | 12 (0.2%)                       | 6 (0.2%)                                   | 6 (0.3%)                                   |                      |
| <b>Age at sexual debut mean (SD)</b>     | 16.94 (2.35)                    | 17.15 (2.38)                               | 16.55 (2.24)                               | <0.001               |
| <b>Lifetime sex partners</b>             |                                 |                                            |                                            | <0.001               |
| <6                                       | 718 (13%)                       | 526 (14%)                                  | 192 (9.5%)                                 |                      |
| 6-12                                     | 1,989 (35%)                     | 1,457 (39%)                                | 532 (26%)                                  |                      |
| >12                                      | 2,997 (53%)                     | 1,708 (46%)                                | 1,289 (64%)                                |                      |

|                                                             | Overall, N = 5,704 <sup>1</sup> | Chlamydia-negative, N = 3,691 <sup>1</sup> | Chlamydia-positive, N = 2,013 <sup>1</sup> | p-value <sup>2</sup> |
|-------------------------------------------------------------|---------------------------------|--------------------------------------------|--------------------------------------------|----------------------|
| <b>Condom use with casual partners (last 12 months)</b>     |                                 |                                            |                                            |                      |
| Always, mostly                                              | 2,610 (46%)                     | 1,745 (47%)                                | 865 (43%)                                  | <0.001               |
| Sometimes                                                   | 1,807 (32%)                     | 1,012 (27%)                                | 795 (39%)                                  |                      |
| Never/not often                                             | 340 (6.0%)                      | 204 (5.5%)                                 | 136 (6.8%)                                 |                      |
| No casual partners                                          | 936 (16%)                       | 721 (20%)                                  | 215 (11%)                                  |                      |
| Unknown                                                     | 11 (0.2%)                       | 9 (0.2%)                                   | 2 (<0.1%)                                  |                      |
| <b>Gonorrhea positivity (n%)<sup>#</sup></b>                | 120 (2.1%)                      | 30 (0.8%)                                  | 90 (4.5%)                                  | <0.001               |
| <b>Use of IUD<sup>#</sup></b>                               |                                 |                                            |                                            |                      |
| Never                                                       | 3,160 (55%)                     | 2,064 (56%)                                | 1,096 (54%)                                | 0.3                  |
| At least once                                               | 2,544 (45%)                     | 1,627 (44%)                                | 917 (46%)                                  |                      |
| <b>Pregnancy<sup>#</sup></b>                                |                                 |                                            |                                            |                      |
| Never pregnant nor tried                                    | 1,765 (31%)                     | 1,157 (31%)                                | 608 (30%)                                  | 0.4                  |
| Tried or trying and failed to become pregnant               | 247 (4.3%)                      | 152 (4.1%)                                 | 95 (4.7%)                                  |                      |
| Ever pregnant                                               | 3,692 (65%)                     | 2,382 (65%)                                | 1,310 (65%)                                |                      |
| Planned (at least once)                                     | 2,989 (52%)                     | 2,039 (55%)                                | 950 (47%)                                  | <0.001               |
| <b>Age at first pregnancy (years) mean (SD)<sup>#</sup></b> | 29.25 (5.35)                    | 29.83 (4.83)                               | 28.20 (6.04)                               | <0.001               |
| <b>Number of chlamydia tests (lifetime)</b>                 |                                 |                                            |                                            |                      |
| 1-2                                                         | 2,581 (45%)                     | 1,999 (54%)                                | 582 (29%)                                  | <0.001               |
| 3-5                                                         | 2,700 (47%)                     | 1,563 (42%)                                | 1,137 (56%)                                |                      |
| 6 or more                                                   | 423 (7.4%)                      | 129 (3.5%)                                 | 294 (15%)                                  |                      |
| <i>Chlamydia specific variables</i>                         |                                 |                                            |                                            |                      |
| <b>Chlamydia diagnosis<sup>#</sup></b>                      |                                 |                                            |                                            |                      |
| No infection                                                | 3,691 (65%)                     | 3,691 (100%)                               | 0 (0%)                                     |                      |
| Asymptomatic                                                | 767 (13%)                       | 0 (0%)                                     | 767 (38%)                                  |                      |
| Symptomatic                                                 | 797 (14%)                       | 0 (0%)                                     | 797 (40%)                                  |                      |
| Serology+ only                                              | 449 (7.9%)                      | 0 (0%)                                     | 449 (22%)                                  |                      |
| <b>Repeat chlamydia infections<sup>#</sup></b>              |                                 |                                            |                                            |                      |
| No infection                                                | 3,691 (65%)                     | 3,691 (100%)                               | 0 (0%)                                     |                      |
| Single                                                      | 1,138 (20%)                     | 0 (0%)                                     | 1,138 (56%)                                |                      |
| Multiple                                                    | 426 (7.5%)                      | 0 (0%)                                     | 426 (21%)                                  |                      |
| Serology+ only                                              | 449 (7.9%)                      | 0 (0%)                                     | 449 (22%)                                  |                      |
| <b>Age at first chlamydia infection<sup>#</sup></b>         |                                 |                                            |                                            |                      |

|                                                    | Overall, N = 5,704 <sup>1</sup> | Chlamydia-negative, N = 3,691 <sup>1</sup> | Chlamydia-positive, N = 2,013 <sup>1</sup> | p-value <sup>2</sup> |
|----------------------------------------------------|---------------------------------|--------------------------------------------|--------------------------------------------|----------------------|
| 13-22                                              | 706 (45%)                       | 0 (0%)                                     | 706 (45%)                                  |                      |
| 23-31                                              | 775 (50%)                       | 0 (0%)                                     | 775 (50%)                                  |                      |
| 32-41                                              | 73 (4.7%)                       | 0 (0%)                                     | 73 (4.7%)                                  |                      |
| No infection / Serology+ only                      | 4,149                           | 3,690                                      | 459                                        |                      |
| <b>Chlamydia antibodies (serology)<sup>#</sup></b> |                                 |                                            |                                            |                      |
| Negative                                           | 2,749 (48%)                     | 2,271 (62%)                                | 478 (24%)                                  |                      |
| Positive                                           | 912 (16%)                       | 0 (0%)                                     | 912 (45%)                                  |                      |
| Unknown <sup>^</sup>                               | 2,043 (36%)                     | 1,420 (38%)                                | 623 (31%)                                  |                      |

Chlamydia-positive was defined as a positive screening-PCR outcome in the CSI study (screening-PCR), and/or the presence of chlamydia IgG antibodies (serology) and/or a self-reported chlamydia infection (self-reported). Variables were assessed using data from baseline unless marked as assessed by the most recent data collection indicated with <sup>#</sup>. Lifetime variables were based on data from sexual debut until baseline questionnaire. If  $\geq 5\%$  was missing in one of the subgroups an extra category 'unknown' was included. <sup>§</sup>Educational level: theoretical (higher professional education, university level education) vs practical (all other educations). + migration background classified as 'Western' if both parents had a Western country of birth i.e. a country from Europe [excluding Turkey], North America, Oceania, Indonesia and Japan, 'non-Western' if at least one parent had a non-Western country of birth, and 'unknown' if one parent was Western while the country of birth of the other parent was unknown or when the country of birth of both parents was unknown. <sup>^</sup>No serum sample submitted or not sufficient amount of serum to be tested. <sup>1</sup>Mean (SD) n (%); <sup>2</sup>Wilcoxon rank sum test; Pearson's Chi-squared test; Fisher's exact test; \* = statistically significant,  $p < 0.05$ . SD = standard deviation. CSI = chlamydia screening implementation. CT = *Chlamydia trachomatis*. IUD = Intrauterine Device. IgG= Immunoglobulin G. BMI = Body mass index.

**Table S4 - Characteristics of the study population by imputation status**

Among those for which year of chlamydia infection was imputed versus not imputed.

|                                        | Overall, N = 2,013 <sup>1</sup> | Not imputed, N = 1,554 <sup>1</sup> | Imputed, N = 459 <sup>1</sup> | p-value <sup>2</sup> |
|----------------------------------------|---------------------------------|-------------------------------------|-------------------------------|----------------------|
| <b>Age (years) mean (SD)</b>           | 34.95 (4.50)                    | 34.63 (4.49)                        | 36.05 (4.36)                  | <0.001               |
| <b>Chlamydia status<sup>#</sup></b>    |                                 |                                     |                               |                      |
| Self-reported + screening-PCR          | 230 (11%)                       | 230 (15%)                           | 0 (0%)                        |                      |
| Self-reported + screening-PCR + CT-IgG | 112 (5.6%)                      | 112 (7.2%)                          | 0 (0%)                        |                      |
| Self-reported + CT-IgG                 | 350 (17%)                       | 349 (22%)                           | 1 (0.2%)                      |                      |
| Self-reported only                     | 868 (43%)                       | 863 (56%)                           | 5 (1.1%)                      |                      |
| Screening-PCR + CT-IgG                 | 1 (<0.1%)                       | 0 (0%)                              | 1 (0.2%)                      |                      |
| Screening-PCR only                     | 3 (0.1%)                        | 0 (0%)                              | 3 (0.7%)                      |                      |
| CT-IgG only                            | 449 (22%)                       | 0 (0%)                              | 449 (98%)                     |                      |
| <b>Migration background</b>            |                                 |                                     |                               |                      |
| Non-western                            | 459 (23%)                       | 384 (25%)                           | 75 (16%)                      | <0.001               |
| Western                                | 1,444 (72%)                     | 1,085 (70%)                         | 359 (78%)                     |                      |
| Unknown                                | 110 (5.5%)                      | 85 (5.5%)                           | 25 (5.4%)                     |                      |
| <b>Educational level<sup>§</sup></b>   |                                 |                                     |                               |                      |
| Practical                              | 560 (28%)                       | 471 (30%)                           | 89 (19%)                      | <0.001               |
| Theoretical                            | 1,451 (72%)                     | 1,082 (70%)                         | 369 (80%)                     |                      |
| Unknown                                | 2 (<0.1%)                       | 1 (<0.1%)                           | 1 (0.2%)                      |                      |
| <b>Smoking (lifetime)</b>              |                                 |                                     |                               |                      |
| Every day                              | 258 (13%)                       | 216 (14%)                           | 42 (9.2%)                     | 0.005                |
| Yes, but not continuously              | 1,100 (55%)                     | 854 (55%)                           | 246 (54%)                     |                      |
| Never                                  | 655 (33%)                       | 484 (31%)                           | 171 (37%)                     |                      |
| <b>BMI</b>                             |                                 |                                     |                               |                      |
| <25                                    | 1,473 (73%)                     | 1,133 (73%)                         | 340 (74%)                     | 0.8                  |
| 25-30                                  | 352 (17%)                       | 273 (18%)                           | 79 (17%)                      |                      |
| >30                                    | 182 (9.0%)                      | 144 (9.3%)                          | 38 (8.3%)                     |                      |
| Unknown                                | 6 (0.3%)                        | 4 (0.3%)                            | 2 (0.4%)                      |                      |
| <b>Age at sexual debut mean (SD)</b>   | 16.55 (2.24)                    | 16.40 (2.13)                        | 17.05 (2.53)                  | <0.001               |
| <b>Lifetime sex partners</b>           |                                 |                                     |                               |                      |
| <6                                     | 192 (9.5%)                      | 131 (8.4%)                          | 61 (13%)                      | <0.001               |
| 6-12                                   | 532 (26%)                       | 380 (24%)                           | 152 (33%)                     |                      |
| >=12                                   | 1,289 (64%)                     | 1,043 (67%)                         | 246 (54%)                     |                      |

|                                                             | Overall, N = 2,013 <sup>1</sup> | Not imputed, N = 1,554 <sup>1</sup> | Imputed, N = 459 <sup>1</sup> | p-value <sup>2</sup> |
|-------------------------------------------------------------|---------------------------------|-------------------------------------|-------------------------------|----------------------|
| <b>Condom use with casual partners (last 12 months)</b>     |                                 |                                     |                               | <0.001               |
| Always, mostly                                              | 865 (43%)                       | 651 (42%)                           | 214 (47%)                     |                      |
| Sometimes                                                   | 795 (39%)                       | 669 (43%)                           | 126 (27%)                     |                      |
| Never/not often                                             | 136 (6.8%)                      | 101 (6.5%)                          | 35 (7.6%)                     |                      |
| No casual partners                                          | 215 (11%)                       | 132 (8.5%)                          | 83 (18%)                      |                      |
| Unknown                                                     | 2 (<0.1%)                       | 1 (<0.1%)                           | 1 (0.2%)                      |                      |
| <b>Gonorrhea positivity (n%)<sup>#</sup></b>                | 90 (4.5%)                       | 82 (5.3%)                           | 8 (1.7%)                      | 0.001                |
| <b>Use of IUD<sup>#</sup></b>                               |                                 |                                     |                               | 0.7                  |
| Never                                                       | 1,096 (54%)                     | 850 (55%)                           | 246 (54%)                     |                      |
| At least once                                               | 917 (46%)                       | 704 (45%)                           | 213 (46%)                     |                      |
| <b>Pregnancy<sup>#</sup></b>                                |                                 |                                     |                               | 0.047                |
| Ever pregnant                                               | 1,310 (65%)                     | 997 (64%)                           | 313 (68%)                     |                      |
| Never pregnant nor tried                                    | 611 (30%)                       | 477 (31%)                           | 134 (29%)                     |                      |
| Tried or trying and failed to become pregnant               | 92 (4.6%)                       | 80 (5.1%)                           | 12 (2.6%)                     |                      |
| <b>Planned (at least once)<sup>#</sup></b>                  |                                 |                                     |                               | <0.001               |
| Not planned (at least once)                                 | 1,089 (54%)                     | 883 (57%)                           | 206 (45%)                     |                      |
| Planned (at least once)                                     | 924 (46%)                       | 671 (43%)                           | 253 (55%)                     |                      |
| <b>Age at first pregnancy (years) mean (SD)<sup>#</sup></b> | 28.20 (6.04)                    | 27.80 (6.14)                        | 29.48 (5.51)                  | <0.001               |
| Unknown                                                     | 703                             | 557                                 | 146                           |                      |
| <b>Number of chlamydia tests (lifetime)</b>                 |                                 |                                     |                               | <0.001               |
| 1-2                                                         | 582 (29%)                       | 359 (23%)                           | 223 (49%)                     |                      |
| 3-5                                                         | 1,137 (56%)                     | 927 (60%)                           | 210 (46%)                     |                      |
| 6 or more                                                   | 294 (15%)                       | 268 (17%)                           | 26 (5.7%)                     |                      |
| <b>Chlamydia infection with symptoms<sup>#</sup></b>        |                                 |                                     |                               | <0.001               |
| Asymptomatic                                                | 767 (38%)                       | 757 (49%)                           | 10 (2.2%)                     |                      |
| Symptomatic                                                 | 797 (40%)                       | 797 (51%)                           | 0 (0%)                        |                      |
| Serology+ only                                              | 449 (22%)                       | 0 (0%)                              | 449 (98%)                     |                      |
| <b>Number of chlamydia infections<sup>#</sup></b>           |                                 |                                     |                               |                      |
| 1                                                           | 1,138 (57%)                     | 1,128 (73%)                         | 10 (2.2%)                     |                      |
| 2 or more                                                   | 426 (21%)                       | 426 (27%)                           | 0 (0%)                        |                      |
| Serology+ only                                              | 449 (22%)                       | 0 (0%)                              | 449 (98%)                     |                      |
| <b>Age at first chlamydia infection<sup>#</sup></b>         |                                 |                                     |                               |                      |
| 13-22                                                       | 706 (45%)                       | 706 (45%)                           | 0 (0%)                        |                      |

|                                                        | Overall, N = 2,013 <sup>1</sup> | Not imputed, N = 1,554 <sup>1</sup> | Imputed, N = 459 <sup>1</sup> | p-value <sup>2</sup> |
|--------------------------------------------------------|---------------------------------|-------------------------------------|-------------------------------|----------------------|
| 23-31                                                  | 775 (50%)                       | 775 (50%)                           | 0 (0%)                        |                      |
| 32-41                                                  | 73 (4.7%)                       | 73 (4.7%)                           | 0 (0%)                        |                      |
| No infection / Serology+ only                          | 459                             | 0                                   | 459                           |                      |
| <b>Chlamydia IgG antibodies (serology)<sup>#</sup></b> |                                 |                                     |                               |                      |
| Negative                                               | 478 (24%)                       | 473 (30%)                           | 5 (1.1%)                      |                      |
| Positive                                               | 912 (45%)                       | 461 (30%)                           | 451 (98%)                     |                      |
| Unknown <sup>^</sup>                                   | 623 (31%)                       | 620 (40%)                           | 3 (0.7%)                      |                      |

Chlamydia-positive was defined as a positive screening-PCR outcome in the CSI study (screening-PCR), and/or the presence of chlamydia IgG antibodies (serology) and/or a self-reported chlamydia infection (self-reported). Variables were assessed using data from baseline unless marked as assessed by the most recent data collection indicated with <sup>#</sup>. Lifetime variables were based on data from sexual debut until baseline questionnaire if  $\geq 5\%$  was missing in one of the subgroups an extra category 'unknown' was included. <sup>^</sup>Educational level: theoretical (higher professional education, university level education) vs practical (all other educations). + migration background classified as 'Western' if both parents had a Western country of birth i.e. a country from Europe [excluding Turkey], North America, Oceania, Indonesia and Japan, 'non-Western' if at least one parent had a non-Western country of birth, and 'unknown' if one parent was Western while the country of birth of the other parent was unknown or when the country of birth of both parents was unknown. <sup>^</sup>No serum sample submitted or not sufficient amount of serum to be tested. <sup>1</sup>Mean (SD) n (%); <sup>2</sup>Wilcoxon rank sum test; Pearson's Chi-squared test; Fisher's exact test; \* = statistically significant,  $p < 0.05$ . SD = standard deviation. CSI = chlamydia screening implementation. CT = *Chlamydia trachomatis*. IUD = Intrauterine Device. IgG= Immunoglobulin G. BMI = Body mass index.

**Table S5 - Characteristics of the study population by diagnosis status**

Among those with an asymptomatic versus serology+ only chlamydia infection.

|                                                         | Overall, N = 1,216 <sup>1</sup> | Asymptomatic,<br>N = 767 <sup>1</sup> | Serology+ only ,<br>N = 449 <sup>1</sup> | p-value <sup>2</sup> |
|---------------------------------------------------------|---------------------------------|---------------------------------------|------------------------------------------|----------------------|
| <b>Age (years) mean (SD)<sup>#</sup></b>                | 35.37 (4.36)                    | 34.95 (4.32)                          | 36.09 (4.34)                             | <0.001               |
| <b>Chlamydia status<sup>#</sup></b>                     |                                 |                                       |                                          |                      |
| Self-reported + screening-PCR                           | 125 (10%)                       | 125 (16%)                             | 0 (0%)                                   |                      |
| Self-reported + screening-PCR + CT-IgG                  | 53 (4.4%)                       | 53 (6.9%)                             | 0 (0%)                                   |                      |
| Self-reported + CT-IgG                                  | 167 (14%)                       | 167 (22%)                             | 0 (0%)                                   |                      |
| Self-reported only                                      | 418 (34%)                       | 418 (54%)                             | 0 (0%)                                   |                      |
| Screening-PCR + CT-IgG                                  | 1 (<0.1%)                       | 1 (0.1%)                              | 0 (0%)                                   |                      |
| Screening-PCR only                                      | 3 (0.2%)                        | 3 (0.4%)                              | 0 (0%)                                   |                      |
| CT-IgG only                                             | 449 (37%)                       | 0 (0%)                                | 449 (100%)                               |                      |
| <b>Migration background</b>                             |                                 |                                       |                                          | 0.13                 |
| Non-western                                             | 231 (19%)                       | 159 (21%)                             | 72 (16%)                                 |                      |
| Western                                                 | 921 (76%)                       | 568 (74%)                             | 353 (79%)                                |                      |
| Unknown                                                 | 64 (5.3%)                       | 40 (5.2%)                             | 24 (5.3%)                                |                      |
| <b>Educational level<sup>§</sup></b>                    |                                 |                                       |                                          | 0.013                |
| Practical                                               | 284 (23%)                       | 198 (26%)                             | 86 (19%)                                 |                      |
| Theoretical                                             | 930 (76%)                       | 568 (74%)                             | 362 (81%)                                |                      |
| Unknown                                                 | 2 (0.2%)                        | 1 (0.1%)                              | 1 (0.2%)                                 |                      |
| <b>Smoking (lifetime)</b>                               |                                 |                                       |                                          | <0.001               |
| Every day                                               | 147 (12%)                       | 108 (14%)                             | 39 (8.7%)                                |                      |
| Yes, but not continuously                               | 679 (56%)                       | 437 (57%)                             | 242 (54%)                                |                      |
| Never                                                   | 390 (32%)                       | 222 (29%)                             | 168 (37%)                                |                      |
| <b>BMI</b>                                              |                                 |                                       |                                          | 0.7                  |
| <25                                                     | 910 (75%)                       | 579 (75%)                             | 331 (74%)                                |                      |
| 25-30                                                   | 199 (16%)                       | 120 (16%)                             | 79 (18%)                                 |                      |
| >30                                                     | 102 (8.4%)                      | 65 (8.5%)                             | 37 (8.2%)                                |                      |
| Unknown                                                 | 5 (0.4%)                        | 3 (0.4%)                              | 2 (0.4%)                                 |                      |
| <b>Age at sexual debut mean (SD)</b>                    | 16.72 (2.26)                    | 16.51 (2.06)                          | 17.07 (2.55)                             | <0.001               |
| <b>Lifetime sex partners</b>                            |                                 |                                       |                                          | <0.001               |
| <6                                                      | 116 (9.5%)                      | 55 (7.2%)                             | 61 (14%)                                 |                      |
| 6-12                                                    | 337 (28%)                       | 188 (25%)                             | 149 (33%)                                |                      |
| >=12                                                    | 763 (63%)                       | 524 (68%)                             | 239 (53%)                                |                      |
| <b>Condom use with casual partners (last 12 months)</b> |                                 |                                       |                                          | <0.001               |



|                                                             | Overall, N = 1,216 <sup>1</sup> | Asymptomatic,<br>N = 767 <sup>1</sup> | Serology+ only ,<br>N = 449 <sup>1</sup> | p-value <sup>2</sup> |
|-------------------------------------------------------------|---------------------------------|---------------------------------------|------------------------------------------|----------------------|
| Always, mostly                                              | 536 (44%)                       | 329 (43%)                             | 207 (46%)                                |                      |
| Sometimes                                                   | 443 (36%)                       | 320 (42%)                             | 123 (27%)                                |                      |
| Never/not often                                             | 86 (7.1%)                       | 51 (6.6%)                             | 35 (7.8%)                                |                      |
| No casual partners                                          | 150 (12%)                       | 67 (8.7%)                             | 83 (18%)                                 |                      |
| Unknown                                                     | 1 (<0.1%)                       | 0 (0%)                                | 1 (0.2%)                                 |                      |
| <b>Gonorrhea positivity (n%)<sup>#</sup></b>                | 35 (2.9%)                       | 27 (3.5%)                             | 8 (1.8%)                                 | 0.080                |
| <b>Use of IUD<sup>#</sup></b>                               |                                 |                                       |                                          | 0.9                  |
| Never                                                       | 648 (53%)                       | 408 (53%)                             | 240 (53%)                                |                      |
| At least once                                               | 568 (47%)                       | 359 (47%)                             | 209 (47%)                                |                      |
| <b>Pregnancy<sup>#</sup></b>                                |                                 |                                       |                                          | 0.026                |
| Ever pregnant                                               | 804 (66%)                       | 494 (64%)                             | 310 (69%)                                |                      |
| Never pregnant nor tried                                    | 355 (29%)                       | 228 (30%)                             | 127 (28%)                                |                      |
| Tried or trying and failed to become pregnant               | 57 (4.7%)                       | 45 (5.9%)                             | 12 (2.7%)                                |                      |
| <b>Planned (at least once)<sup>#</sup></b>                  |                                 |                                       |                                          | 0.001                |
| Not planned (at least once)                                 | 610 (50%)                       | 412 (54%)                             | 198 (44%)                                |                      |
| Planned (at least once)                                     | 606 (50%)                       | 355 (46%)                             | 251 (56%)                                |                      |
| <b>Age at first pregnancy (years) mean (SD)<sup>#</sup></b> | 29.02 (5.73)                    | 28.72 (5.86)                          | 29.49 (5.48)                             | 0.2                  |
| <b>Number of chlamydia tests (lifetime)</b>                 |                                 |                                       |                                          | <0.001               |
| 1-2                                                         | 412 (34%)                       | 190 (25%)                             | 222 (49%)                                |                      |
| 3-5                                                         | 666 (55%)                       | 462 (60%)                             | 204 (45%)                                |                      |
| 6 or more                                                   | 138 (11%)                       | 115 (15%)                             | 23 (5.1%)                                |                      |
| <i>Chlamydia specific variables</i>                         |                                 |                                       |                                          |                      |
| <b>Repeat chlamydia infections<sup>#</sup></b>              |                                 |                                       |                                          |                      |
| Single                                                      | 637 (52%)                       | 637 (83%)                             | 0 (0%)                                   |                      |
| Multiple                                                    | 130 (11%)                       | 130 (17%)                             | 0 (0%)                                   |                      |
| Serology+ only                                              | 449 (37%)                       | 0 (0%)                                | 449 (100%)                               |                      |
| <b>Age at first chlamydia infection<sup>#</sup></b>         |                                 |                                       |                                          |                      |
| 13-22                                                       | 297 (39%)                       | 297 (39%)                             | 0 (0%)                                   |                      |
| 23-31                                                       | 421 (56%)                       | 421 (56%)                             | 0 (0%)                                   |                      |
| 32-41                                                       | 39 (5.2%)                       | 39 (5.2%)                             | 0 (0%)                                   |                      |
| Not reported/Serology+ only                                 | 459                             | 10                                    | 449                                      |                      |
| <b>Chlamydia antibodies (serology)<sup>#</sup></b>          |                                 |                                       |                                          |                      |
| Negative                                                    | 252 (21%)                       | 252 (33%)                             | 0 (0%)                                   |                      |
| Positive                                                    | 670 (55%)                       | 221 (29%)                             | 449 (100%)                               |                      |

|                      | <b>Overall, N = 1,216<sup>1</sup></b> | <b>Asymptomatic,<br/>N = 767<sup>1</sup></b> | <b>Serology+ only ,<br/>N = 449<sup>1</sup></b> | <b>p-value<sup>2</sup></b> |
|----------------------|---------------------------------------|----------------------------------------------|-------------------------------------------------|----------------------------|
| Unknown <sup>^</sup> | 294 (24%)                             | 294 (38%)                                    | 0 (0%)                                          |                            |

Asymptomatic was defined as screening-PCR+ and/or self-reported + without symptoms while serology+ only was defined as presence of chlamydia IgG antibodies without any other chlamydia indicators. Variables were assessed using data from baseline unless marked as assessed by the most recent data collection indicated with #. Lifetime variables were based on data from sexual debut until baseline questionnaire If  $\geq 5\%$  was missing in one of the subgroups an extra category `unknown` was included. <sup>3</sup>Educational level: theoretical (higher professional education, university level education) vs practical (all other educations). + migration background classified as 'Western' if both parents had a Western country of birth i.e. a country from Europe [excluding Turkey], North America, Oceania, Indonesia and Japan, 'non-Western' if at least one parent had a non-Western country of birth, and 'unknown' if one parent was Western while the country of birth of the other parent was unknown or when the country of birth of both parents was unknown. <sup>4</sup>No serum sample submitted or not sufficient amount of serum to be tested. <sup>1</sup>Mean (SD) n (%); <sup>2</sup>Wilcoxon rank sum test; Pearson's Chi-squared test; Fisher's exact test; \* = statistically significant,  $p < 0.05$ . SD = standard deviation. CSI = chlamydia screening implementation. CT = *Chlamydia trachomatis*. IUD = Intrauterine Device. IgG= Immunoglobulin G. BMI = Body mass index.

**Table S6 - Characteristics of the study population by symptoms status**

Among those with only asymptomatic infections(s) versus those who experienced symptomatic chlamydia infection(s).

|                                          | <b>Overall, N = 1,5641</b> | <b>Asymptomatic<br/>, N = 767<sup>1</sup></b> | <b>Symptomatic,<br/>N = 797<sup>1</sup></b> | <b>p-value<sup>2</sup></b> |
|------------------------------------------|----------------------------|-----------------------------------------------|---------------------------------------------|----------------------------|
| <b>Age (years) mean (SD)<sup>#</sup></b> | 34.63 (4.49)               | 34.95 (4.32)                                  | 34.31 (4.64)                                | 0.009                      |
| <b>Chlamydia status<sup>#</sup></b>      |                            |                                               |                                             |                            |
| Self-reported + screening-PCR            | 230 (15%)                  | 125 (16%)                                     | 105 (13%)                                   | 0.2                        |
| Self-reported + screening-PCR + CT-IgG   | 112 (7.2%)                 | 53 (6.9%)                                     | 59 (7.4%)                                   |                            |
| Self-reported + CT-IgG                   | 350 (22%)                  | 167 (22%)                                     | 183 (23%)                                   |                            |
| Self-reported only                       | 868 (55%)                  | 418 (54%)                                     | 450 (56%)                                   |                            |
| Screening-PCR + CT-IgG                   | 1 (<0.1%)                  | 1 (0.1%)                                      | 0 (0%)                                      |                            |
| Screening-PCR only                       | 3 (0.2%)                   | 3 (0.4%)                                      | 0 (0%)                                      |                            |
| CT-IgG only                              | 0 (0%)                     | 0 (0%)                                        | 0 (0%)                                      |                            |
| <b>Migration background</b>              |                            |                                               |                                             | <0.001                     |
| Non-western                              | 387 (25%)                  | 159 (21%)                                     | 228 (29%)                                   |                            |
| Western                                  | 1,091 (70%)                | 568 (74%)                                     | 523 (66%)                                   |                            |
| Unknown                                  | 86 (5.5%)                  | 40 (5.2%)                                     | 46 (5.8%)                                   |                            |
| <b>Educational level<sup>§</sup></b>     |                            |                                               |                                             | <0.001                     |
| Practical                                | 474 (30%)                  | 198 (26%)                                     | 276 (35%)                                   |                            |
| Theoretical                              | 1,089 (70%)                | 568 (74%)                                     | 521 (65%)                                   |                            |
| Unknown                                  | 1 (<0.1%)                  | 1 (0.1%)                                      | 0 (0%)                                      |                            |
| <b>Smoking (lifetime)</b>                |                            |                                               |                                             | 0.2                        |
| Every day                                | 219 (14%)                  | 108 (14%)                                     | 111 (14%)                                   |                            |
| Yes, but not continuously                | 858 (55%)                  | 437 (57%)                                     | 421 (53%)                                   |                            |
| Never                                    | 487 (31%)                  | 222 (29%)                                     | 265 (33%)                                   |                            |
| <b>BMI</b>                               |                            |                                               |                                             | 0.094                      |
| <25                                      | 1,142 (73%)                | 579 (75%)                                     | 563 (71%)                                   |                            |
| 25-30                                    | 273 (17%)                  | 120 (16%)                                     | 153 (19%)                                   |                            |
| >30                                      | 145 (9.3%)                 | 65 (8.5%)                                     | 80 (10%)                                    |                            |
| Unknown                                  | 4 (0.3%)                   | 3 (0.4%)                                      | 1 (0.1%)                                    |                            |
| <b>Age at sexual debut mean (SD)</b>     | 16.40 (2.12)               | 16.51 (2.06)                                  | 16.29 (2.18)                                | 0.020                      |
| <b>Lifetime sex partners</b>             |                            |                                               |                                             | 0.2                        |
| <6                                       | 131 (8.4%)                 | 55 (7.2%)                                     | 76 (9.5%)                                   |                            |

|                                                             | Overall, N = 1,5641        | Asymptomatic<br>, N = 767 <sup>1</sup>        | Symptomatic,<br>N = 797 <sup>1</sup>        | p-value <sup>2</sup>       |
|-------------------------------------------------------------|----------------------------|-----------------------------------------------|---------------------------------------------|----------------------------|
| 6-12                                                        | 383 (24%)                  | 188 (25%)                                     | 195 (24%)                                   |                            |
| >=12                                                        | 1,050 (67%)                | 524 (68%)                                     | 526 (66%)                                   |                            |
| <b>Condom use with casual partners (last 12 months)</b>     |                            |                                               |                                             | 0.8                        |
| Always, mostly                                              | 658 (42%)                  | 329 (43%)                                     | 329 (41%)                                   |                            |
| Sometimes                                                   | 672 (43%)                  | 320 (42%)                                     | 352 (44%)                                   |                            |
| Never/not often                                             | 101 (6.5%)                 | 51 (6.6%)                                     | 50 (6.3%)                                   |                            |
| No casual partners                                          | 132 (8.4%)                 | 67 (8.7%)                                     | 65 (8.2%)                                   |                            |
| Unknown                                                     | 1 (<0.1%)                  | 0 (0%)                                        | 1 (0.1%)                                    |                            |
| <b>Gonorrhea positivity (n%)<sup>#</sup></b>                | 82 (5.2%)                  | 27 (3.5%)                                     | 55 (6.9%)                                   | 0.003                      |
| <b>Use of IUD<sup>#</sup></b>                               |                            |                                               |                                             | 0.2                        |
| Never                                                       | 856 (55%)                  | 408 (53%)                                     | 448 (56%)                                   |                            |
| At least once                                               | 708 (45%)                  | 359 (47%)                                     | 349 (44%)                                   |                            |
| <b>Pregnancy<sup>#</sup></b>                                |                            |                                               |                                             | 0.3                        |
| Ever pregnant                                               | 1,000 (64%)                | 494 (64%)                                     | 506 (63%)                                   |                            |
| Never pregnant nor tried                                    | 484 (31%)                  | 228 (30%)                                     | 256 (32%)                                   |                            |
| Tried or trying and failed to become pregnant               | 80 (5.1%)                  | 45 (5.9%)                                     | 35 (4.4%)                                   |                            |
| <b>Planned (at least once)<sup>#</sup></b>                  |                            |                                               |                                             | 0.011                      |
| Not planned (at least once)                                 | 891 (57%)                  | 412 (54%)                                     | 479 (60%)                                   |                            |
| Planned (at least once)                                     | 673 (43%)                  | 355 (46%)                                     | 318 (40%)                                   |                            |
| <b>Age at first pregnancy (years) mean (SD)<sup>#</sup></b> | 27.80 (6.15)               | 28.72 (5.86)                                  | 26.90 (6.29)                                | <0.001                     |
| <b>Number of chlamydia tests (lifetime)</b>                 |                            |                                               |                                             | 0.033                      |
| 1-2                                                         | 360 (23%)                  | 190 (25%)                                     | 170 (21%)                                   |                            |
| 3-5                                                         | 933 (60%)                  | 462 (60%)                                     | 471 (59%)                                   |                            |
| 6 or more                                                   | 271 (17%)                  | 115 (15%)                                     | 156 (20%)                                   |                            |
| <i>Chlamydia specific variables</i>                         |                            |                                               |                                             |                            |
| <b>Repeat chlamydia infections<sup>#</sup></b>              |                            |                                               |                                             | <0.001                     |
| Single                                                      | 1,138 (73%)                | 637 (83%)                                     | 501 (63%)                                   |                            |
| Multiple                                                    | 426 (27%)                  | 130 (17%)                                     | 296 (37%)                                   |                            |
| <b>Chlamydia antibodies (serology)<sup>#</sup></b>          |                            |                                               |                                             | 0.2                        |
| Negative                                                    | 478 (31%)                  | 252 (33%)                                     | 226 (28%)                                   |                            |
| Positive                                                    | 463 (30%)                  | 221 (29%)                                     | 242 (30%)                                   |                            |
| Unknown <sup>^</sup>                                        | 623 (40%)                  | 294 (38%)                                     | 329 (41%)                                   |                            |
| <b>Age at first chlamydia infection<sup>&amp;</sup></b>     | <b>Overall, N = 1,5641</b> | <b>Asymptomatic<br/>, N = 783<sup>1</sup></b> | <b>Symptomatic,<br/>N = 781<sup>1</sup></b> | <b>p-value<sup>2</sup></b> |
| <18                                                         | 107 (6.8%)                 | 37 (4.7%)                                     | 70 (9.0%)                                   | <0.001                     |

|         | <b>Overall, N = 1,5641</b> | <b>Asymptomatic, N = 767<sup>1</sup></b> | <b>Symptomatic, N = 797<sup>1</sup></b> | <b>p-value<sup>2</sup></b> |
|---------|----------------------------|------------------------------------------|-----------------------------------------|----------------------------|
| 18 – 22 | 721 (46.1%)                | 402 (51.3%)                              | 319 (40.8%)                             |                            |
| 23 - 41 | 736 (47.1%)                | 344 (43.9%)                              | 392 (50.2%)                             |                            |

Asymptomatic was defined as screening-PCR+ and/or self-reported+ without symptoms while symptomatic was defined as screening-PCR+ and/or self-reported+ with symptoms. Variables were assessed using data from baseline unless marked as assessed by the most recent data collection indicated with #. Lifetime variables were based on data from sexual debut until baseline questionnaire If  $\geq 5\%$  was missing in one of the subgroups an extra category 'unknown' was included.

<sup>5</sup>Educational level: theoretical (higher professional education, university level education) vs practical (all other educations). + migration background classified as 'Western' if both parents had a Western country of birth i.e. a country from Europe [excluding Turkey], North America, Oceania, Indonesia and Japan, 'non-Western' if at least one parent had a non-Western country of birth, and 'unknown' if one parent was Western while the country of birth of the other parent was unknown or when the country of birth of both parents was unknown. ^No serum sample submitted or not sufficient amount of serum to be tested. & Numbers are different from numbers by symptoms group in the rest of Table S6 because women who experienced an asymptomatic infection before their first symptomatic infection are now categorized as asymptomatic.

<sup>1</sup>Mean (SD) n (%); <sup>2</sup>Wilcoxon rank sum test; Pearson's Chi-squared test; Fisher's exact test; \* = statistically significant,  $p < 0.05$ . SD = standard deviation. CSI = chlamydia screening implementation. CT = *Chlamydia trachomatis*. IUD = Intrauterine Device. IgG= Immunoglobulin G. BMI = Body mass index.

**Table S7 - Sensitivity analysis pelvic inflammatory disease (PID)**

Association between chlamydia positivity and hospitalized pelvic inflammatory disease (PID) in women participating in NECCST. Women who had already experienced non-hospitalized PID episodes were excluded from the analyses.

|                         | N* | Person-years | HR <sup>†</sup> | 95%CI       | P value | aHR <sup>‡#</sup> | 95%CI       | P value |
|-------------------------|----|--------------|-----------------|-------------|---------|-------------------|-------------|---------|
| <b>PID Hospitalized</b> |    |              |                 |             |         |                   |             |         |
| Chlamydia negative      | 53 | 77,747       | Ref             |             |         | Ref               |             |         |
| Chlamydia positive      | 38 | 23,229       | 2.47            | 1.56 – 3.94 | 0.0002  | 2.08              | 1.28 – 3.41 | 0.0038  |

Chlamydia positive was defined as a positive PCR-test outcome in the CSI study (screening-PCR), and/or the presence of chlamydia IgG and/or a self-reported chlamydia infection. For these analyses, multiple imputations were used to estimate time of first chlamydia infection in women without a known first year of chlamydia infection. \*Median cases of 15 multiple imputation datasets. <sup>†</sup> Estimated from 15 multiple imputation datasets. <sup>#</sup> models adjusted for educational level, age (linear) and number of lifetime chlamydia tests. HR = Hazard Ratio. NECCST = Netherlands chlamydia cohort study. CI = Confidence Interval. aHR= Adjusted Hazard Ratio.

**Table S8 - Association between stratified chlamydia positivity and outcomes in women participating in NECCST**

Outcomes were pelvic inflammatory disease, ectopic pregnancy and tubal factor infertility. Chlamydia positivity was stratified by chlamydia status subgroups for diagnosis or repeat infection.

|                                    | Events |                           | Time | Crude hazard ratio               |           |         | Adjusted Hazard Ratio <sup>a,b,c</sup> |       |           |
|------------------------------------|--------|---------------------------|------|----------------------------------|-----------|---------|----------------------------------------|-------|-----------|
|                                    | N*     | Person-years <sup>#</sup> |      | HR <sub>95%CI</sub> <sup>P</sup> | 95%CI     | P value | aHR <sub>95%CI</sub> <sup>P</sup>      | 95%CI | P value   |
| <b>Pelvic Inflammatory Disease</b> |        |                           |      |                                  |           |         |                                        |       |           |
| Chlamydia negative                 | 146    | 78,201                    | Ref  |                                  |           |         | Ref                                    |       |           |
| <i>Diagnosis</i>                   |        |                           |      |                                  |           |         |                                        |       |           |
| Chlamydia positive                 |        |                           |      |                                  |           |         |                                        |       |           |
| Asymptomatic                       | 23     | 8,958                     | 1.25 | 0.79 - 1.98                      | 0.34      | 1.06    | 0.66 - 1.69                            |       | 0.82      |
| Symptomatic                        | 53     | 9,109                     | 2.99 | 2.16 - 4.14                      | < 0.00001 | 2.29    | 1.62 - 3.25                            |       | < 0.00001 |
| Serology+ only                     | 14     | 5,605                     | 1.36 | 0.78 - 2.39                      | 0.28      | 1.35    | 0.78 - 2.35                            |       | 0.28      |
| <i>Repeat infection</i>            |        |                           |      |                                  |           |         |                                        |       |           |
| Chlamydia positive                 |        |                           |      |                                  |           |         |                                        |       |           |
| Single                             | 58     | 14,748                    | 2.01 | 1.46 - 2.76                      | < 0.0001  | 1.65    | 1.18 - 2.30                            |       | 0.003     |
| Multiple                           | 18     | 3,286                     | 2.68 | 1.62 - 4.43                      | 0.00016   | 1.90    | 1.11 - 3.25                            |       | 0.019     |
| Serology+ only                     | 14     | 5,605                     | 1.36 | 0.78 - 2.39                      | 0.28      | 1.35    | 0.78 - 2.35                            |       | 0.28      |
| <b>Ectopic pregnancy</b>           |        |                           |      |                                  |           |         |                                        |       |           |
| Chlamydia negative                 | 52     | 78,897                    | Ref  |                                  |           |         | Ref                                    |       |           |
| <i>Diagnosis</i>                   |        |                           |      |                                  |           |         |                                        |       |           |
| Chlamydia positive                 |        |                           |      |                                  |           |         |                                        |       |           |
| Asymptomatic                       | 13     | 9,151                     | 1.74 | 0.93 - 3.26                      | 0.084     | 1.77    | 0.92 - 3.41                            |       | 0.088     |
| Symptomatic                        | 18     | 9,485                     | 2.43 | 1.39 - 4.23                      | 0.002     | 2.14    | 1.17 - 3.92                            |       | 0.014     |
| Serology+ only                     | 8      | 5,694                     | 1.89 | 0.87 - 4.10                      | 0.106     | 1.85    | 0.86 - 3.98                            |       | 0.12      |
| <i>Repeat infection</i>            |        |                           |      |                                  |           |         |                                        |       |           |
| Chlamydia positive                 |        |                           |      |                                  |           |         |                                        |       |           |
| Single                             | 24     | 15,175                    | 2.03 | 1.23 - 3.36                      | 0.006     | 1.92    | 1.13 - 3.29                            |       | 0.018     |
| Multiple                           | 7      | 3,427                     | 2.31 | 1.02 - 5.22                      | 0.044     | 2.32    | 0.96 - 5.61                            |       | 0.06      |
| Serology+ only                     | 8      | 5,694                     | 1.89 | 0.87 - 4.10                      | 0.106     | 1.85    | 0.86 - 3.98                            |       | 0.12      |
| <b>Tubal factor infertility</b>    |        |                           |      |                                  |           |         |                                        |       |           |
| Chlamydia negative                 | 25     | 79,002                    | Ref  |                                  |           |         | Ref                                    |       |           |
| <i>Diagnosis</i>                   |        |                           |      |                                  |           |         |                                        |       |           |
| Chlamydia positive                 |        |                           |      |                                  |           |         |                                        |       |           |

|                         |    |        |      |             |          |      |             |          |
|-------------------------|----|--------|------|-------------|----------|------|-------------|----------|
| Asymptomatic            | 9  | 9,144  | 2.3  | 1.04 - 5.07 | 0.04     | 2.26 | 1.01 - 5.10 | 0.05     |
| Symptomatic             | 17 | 9,490  | 4.38 | 2.31 - 8.32 | < 0.0001 | 4.45 | 2.27 - 8.73 | < 0.0001 |
| Serology+ only          | 8  | 5,694  | 1.28 | 0.37 - 4.45 | 0.69     | 1.27 | 0.37 - 4.40 | 0.70     |
| <b>Repeat infection</b> |    |        |      |             |          |      |             |          |
| Chlamydia positive      |    |        |      |             |          |      |             |          |
| Single                  | 24 | 15,165 | 3.89 | 2.17 - 6.97 | < 0.0001 | 3.75 | 2.04 - 6.87 | < 0.0001 |
| Multiple                | 2  | 3,434  | 1.23 | 0.28 - 5.45 | 0.78     | 1.21 | 0.26 - 5.55 | 0.80     |
| Serology+ only          | 8  | 5,694  | 1.28 | 0.37 - 4.45 | 0.69     | 1.26 | 0.36 - 4.39 | 0.71     |

Chlamydia positive was defined as a positive PCR-test outcome in the CSI study (screening-PCR), and/or the presence of chlamydia IgG and/or a self-reported chlamydia infection. Symptomatic was defined as screening-PCR+ and/or self-reported+ with symptoms.

Asymptomatic was defined as screening-PCR+ and/or self-reported + without symptoms. Serology+ only was defined as presence of chlamydia IgG antibodies without any other chlamydia indicators. For these analyses, multiple imputations were used to estimate time of first chlamydia infection in women without a known first year of chlamydia infection. \*Median cases of 15 multiple imputation datasets. # person-years for pelvic inflammatory disease, ectopic pregnancy, tubal factor infertility and pregnancies. ¶ Estimated from 15 multiple imputation datasets. <sup>a</sup>PID Model adjusted for educational level, age (linear) and number of lifetime chlamydia tests. <sup>b</sup>Ectopic pregnancy model adjusted for age (linear), migration background, educational level, number of lifetime sex partners, number of lifetime chlamydia tests and IUD insertion. <sup>c</sup>TFI model adjusted for age (linear) and number of lifetime chlamydia tests.

NECCST = Netherlands chlamydia cohort study. CI = Confidence Interval. aHR= Adjusted Hazard Ratio.



**Table S9 - Sensitivity analysis** - Association between chlamydia positivity and complications (pelvic inflammatory disease, ectopic pregnancy, tubal factor infertility) in women participating in NECCST based on: 1. data of chlamydia positives based on screening-PCR results and chlamydia negatives only; and 2. data of chlamydia positives based on self-reported diagnosis and chlamydia negatives only. Women with Serology+ only serology+ only infections were excluded in these analyses.

|           | Crude HR<br>(95% CI)                                      | p<br>value | Adjusted <sup>a</sup><br>HR (95% CI) | p<br>value | Crude HR (95% CI)                                         | p-value  | Adjusted <sup>b</sup> HR<br>(95% CI) | p<br>value |
|-----------|-----------------------------------------------------------|------------|--------------------------------------|------------|-----------------------------------------------------------|----------|--------------------------------------|------------|
|           | Model 1: Pelvic inflammatory disease <sup>a</sup> (n=142) |            |                                      |            | Model 2: Pelvic inflammatory disease <sup>a</sup> (n=192) |          |                                      |            |
| Chlamydia |                                                           |            |                                      |            |                                                           |          |                                      |            |
| Negative  | Ref.                                                      |            | Ref.                                 |            | Ref.                                                      |          | Ref.                                 |            |
| Positive  | 2.03 (1.20-3.44)                                          | 0.009      | 1.37 (0.79-2.38)                     | 0.25       | 2.19 (1.59-3.02)                                          | < 0.0001 | 1.78 (1.26-2.51)                     | 0.001      |
|           | Model 1: Ectopic pregnancy <sup>b</sup> (n=51)            |            |                                      |            | Model 2: Ectopic pregnancy <sup>b</sup> (n=73)            |          |                                      |            |
| Chlamydia |                                                           |            |                                      |            |                                                           |          |                                      |            |
| Negative  | Ref.                                                      |            |                                      |            | Ref.                                                      |          |                                      |            |
| Positive  | 1.27 (0.44-3.63)                                          | 0.65       | 0.90 (0.30-2.75)                     | 0.85       | 2.46 (1.50-4.05)                                          | 0.0006   | 2.33 (1.34-4.04)                     | 0.004      |
|           | Model 1: Tubal factor infertility <sup>c</sup> (n=26)     |            |                                      |            | Model 2: Tubal factor infertility <sup>c</sup> (n=48)     |          |                                      |            |
| Chlamydia |                                                           |            |                                      |            |                                                           |          |                                      |            |
| Negative  | Ref.                                                      |            |                                      |            | Ref.                                                      |          |                                      |            |
| Positive  | 1.78 (0.49-6.38)                                          | 0.36       | 1.45 (0.40-5.31)                     | 0.61       | 3.71 (2.04-6.73)                                          | < 0.0001 | 4.03 (2.21-7.64)                     | < 0.0001   |

Chlamydia positive was defined as a positive PCR-test result in the screening study (screening-PCR) (model 1), or a self-reported chlamydia infection (self-reported) (model 2). <sup>a</sup> PID Model adjusted for educational level, age and number of lifetime chlamydia tests. <sup>b</sup> Ectopic pregnancy model adjusted for age, migration background, educational level, number of lifetime sex partners, number of lifetime chlamydia tests and IUD insertion. <sup>c</sup> TFI model adjusted for age and number of lifetime chlamydia tests.

NECCST = Netherlands chlamydia cohort study. CI = Confidence Interval. aHR= Adjusted Hazard Ratio.

**Table S10 - Sensitivity analysis** - Association between chlamydia positivity and complications (pelvic inflammatory disease, ectopic pregnancy, tubal factor infertility) in women participating in NECCST based on data of with and without women with serology+ only infections.

|     | With serology+ only infections | Without serology+ only infections |
|-----|--------------------------------|-----------------------------------|
|     | aHR (95% CI)                   | aHR (95% CI)                      |
| PID | 1.62 (95% CI 1.20 - 2.17)      | 1.71 (95% CI 1.24 - 2.34)         |
| EP  | 1.81 (95% CI 1.08 - 3.05)      | 1.81 (95% CI 1.09 - 3.05)         |
| TFI | 2.75 (95% CI 1.53 - 4.94)      | 3.37 (95% CI 1.82 - 6.22)         |

<sup>a</sup> aHR for Pelvic inflammatory disease model adjusted for age (linear), educational level, and number of lifetime chlamydia tests.

<sup>b</sup> aHR for Ectopic pregnancy model adjusted for age (linear), migration background, educational level, number of lifetime sex partners, number of lifetime chlamydia tests and IUD insertion.

<sup>c</sup> aHR for Tubal factor infertility adjusted for age (linear) number of lifetime chlamydia tests.

**Table S11** - Risk estimates for potential confounders in models with chlamydia.

For each outcome potential confounders are assessed one-by-one together with chlamydia. Gray/white boxed indicate different models.

| Covariates                         |             | Pelvic inflammatory disease |                   | Ectopic pregnancy         |                   | Tubal factor infertility  |                   |
|------------------------------------|-------------|-----------------------------|-------------------|---------------------------|-------------------|---------------------------|-------------------|
|                                    |             | aHR (95%CI)                 | p-value           | aHR (95%CI)               | p-value           | aHR (95%CI)               | p-value           |
| Chlamydia (unadjusted)             | Negative    | Ref.                        |                   | Ref.                      |                   | Ref.                      |                   |
|                                    | Positive    | <b>1.95 (1.47 - 2.59)</b>   | <b>&lt; 0.001</b> | <b>2.11 (1.34 - 3.31)</b> | <b>0.002</b>      | <b>2.90 (1.63 - 5.01)</b> | <b>&lt; 0.001</b> |
| Chlamydia                          | Negative    | Ref.                        |                   | Ref.                      |                   | Ref.                      |                   |
|                                    | Positive    | <b>1.91 (1.44 - 2.54)</b>   | <b>&lt; 0.001</b> | <b>1.83 (1.17 - 2.87)</b> | <b>0.010</b>      | <b>2.66 (1.51 - 4.71)</b> | <b>&lt; 0.001</b> |
| Migration background               | Western     | Ref.                        |                   | Ref.                      |                   | Ref.                      |                   |
|                                    | Non-Western | 1.17 (0.82 - 1.66)          | 0.380             | <b>2.46 (1.53 - 3.94)</b> | <b>&lt; 0.001</b> | 1.69 (0.88 - 3.27)        | 0.110             |
|                                    | Unknown     | <b>1.81 (1.11 - 2.95)</b>   | <b>0.020</b>      | 1.81 (0.77 - 4.25)        | 0.171             | 1.8 (0.62 - 5.18)         | 0.270             |
| Chlamydia                          | Negative    | Ref.                        |                   | Ref.                      |                   | Ref.                      |                   |
|                                    | Positive    | <b>1.76 (1.32 - 2.33)</b>   | <b>&lt; 0.001</b> | <b>1.84 (1.18 - 2.88)</b> | <b>0.008</b>      | <b>2.69 (1.52 - 4.74)</b> | <b>0.001</b>      |
| Education level                    | Practical   | Ref.                        |                   | Ref.                      |                   | Ref.                      |                   |
|                                    | Theoretical | <b>0.44 (0.33 - 0.57)</b>   | <b>&lt; 0.001</b> | <b>0.39 (0.25 - 0.59)</b> | <b>&lt; 0.001</b> | 0.6 (0.33 - 1.08)         | 0.090             |
| Chlamydia                          | Negative    | Ref.                        |                   | Ref.                      |                   | Ref.                      |                   |
|                                    | Positive    | <b>1.84 (1.38 - 2.46)</b>   | <b>&lt; 0.001</b> | <b>2.31 (1.46 - 3.64)</b> | <b>&lt; 0.001</b> | <b>2.76 (1.54 - 4.94)</b> | <b>&lt; 0.001</b> |
| Number of lifetime chlamydia tests | 1 - 2       | Ref.                        |                   | Ref.                      |                   | Ref.                      |                   |
|                                    | 3 - 5       | 1.22 (0.87 - 1.69)          | 0.240             | 0.86 (0.52 - 1.43)        | 0.560             | 1.67 (0.85 - 3.29)        | 0.130             |
|                                    | 6 or more   | 1.32 (0.96 - 1.8)           | 0.090             | 0.63 (0.37 - 1.08)        | 0.090             | 1.17 (0.58 - 2.36)        | 0.650             |
| Chlamydia                          | Negative    | Ref.                        |                   | Ref.                      |                   | Ref.                      |                   |
|                                    | Positive    | <b>1.91 (1.44 - 2.52)</b>   | <b>&lt; 0.001</b> | <b>2.14 (1.38 - 3.33)</b> | <b>&lt; 0.001</b> | <b>2.86 (1.63 - 5.03)</b> | <b>&lt; 0.001</b> |
| Age of sexual debut (linear)       |             | 0.9 (0.85 - 0.96)           | 0.002             | 1.08 (0.99 - 1.18)        | 0.100             | 1.00 (0.88 - 1.14)        | 0.945             |
| Chlamydia                          | Negative    | Ref.                        |                   | Ref.                      |                   | Ref.                      |                   |
|                                    | Positive    | <b>1.92 (1.45 - 2.54)</b>   | <b>&lt; 0.001</b> | <b>2.35 (1.51 - 3.67)</b> | <b>&lt; 0.001</b> | <b>2.61 (1.48 - 4.61)</b> | <b>0.001</b>      |
| Number of lifetime sex partners    | <6          | Ref.                        |                   | Ref.                      |                   | Ref.                      |                   |
|                                    | 6 - 12      | 1.06 (0.64 - 1.75)          | 0.820             | 0.63 (0.35 - 1.11)        | 0.110             | 0.55 (0.18 - 1.7)         | 0.300             |
|                                    | >12         | 1.26 (0.79 - 2.03)          | 0.330             | <b>0.3 (0.17 - 0.55)</b>  | <b>&lt; 0.001</b> | 1.24 (0.48 - 3.25)        | 0.650             |
| Chlamydia                          | Negative    | Ref.                        |                   | Ref.                      |                   | Ref.                      |                   |
|                                    | Positive    | <b>1.92 (1.45 - 2.54)</b>   | <b>&lt; 0.001</b> | <b>1.97 (1.26 - 3.09)</b> | <b>&lt; 0.001</b> | <b>2.71 (1.53 - 4.79)</b> | <b>0.001</b>      |
| Gonorrhea                          | Negative    | Ref.                        |                   | Ref.                      |                   | Ref.                      |                   |
|                                    | Positive    | 1.56 (0.82 - 2.98)          | 0.173             | 2.4 (1.02 - 5.63)         | 0.045             | 2.39 (0.83 - 6.9)         | 0.104             |

|                                                  |                           |                           |                   |                           |              |                           |                   |
|--------------------------------------------------|---------------------------|---------------------------|-------------------|---------------------------|--------------|---------------------------|-------------------|
| Chlamydia                                        | Negative                  | Ref.                      |                   | Ref.                      |              |                           |                   |
|                                                  | Positive                  | <b>1.96 (1.48 - 2.59)</b> | <b>&lt; 0.001</b> | <b>2.08 (1.34 - 3.24)</b> | <b>0.001</b> | <b>2.86 (1.63 - 5.01)</b> | <b>&lt; 0.001</b> |
| Use of IUD                                       | Never                     | Ref.                      |                   | Ref.                      |              |                           |                   |
|                                                  | At least once             | 0.97 (0.75 - 1.26)        | 0.813             | 0.72 (0.47 - 1.1)         | 0.129        | 1.31 (0.75 - 2.26)        | 0.334             |
| Chlamydia                                        | Negative                  | Ref.                      |                   | Ref.                      |              | Ref.                      |                   |
|                                                  | Positive                  | <b>1.93 (1.46 - 2.56)</b> | <b>&lt; 0.001</b> | <b>2.07 (1.33 - 3.22)</b> | <b>0.002</b> | <b>2.79 (1.59 - 4.9)</b>  | <b>0.001</b>      |
| BMI                                              | <25                       | Ref.                      |                   | Ref.                      |              | Ref.                      |                   |
|                                                  | 25-30                     | 0.95 (0.66 - 1.36)        | 0.763             | 1.17 (0.68 - 2.01)        | 0.572        | 0.94 (0.43 - 2.05)        | 0.864             |
|                                                  | >30                       | 1.55 (1.03 - 2.33)        | 0.036             | 1.34 (0.66 - 2.73)        | 0.410        | 2.28 (1.08 - 4.82)        | 0.032             |
| Chlamydia                                        | Negative                  | Ref.                      |                   | Ref.                      |              | Ref.                      |                   |
|                                                  | Positive                  | <b>1.85 (1.39 - 2.45)</b> | <b>&lt; 0.001</b> | <b>2.04 (1.31 - 3.18)</b> | <b>0.002</b> | <b>2.79 (1.58 - 4.91)</b> | <b>0.001</b>      |
| Smoking                                          | Daily                     | Ref.                      |                   | Ref.                      |              | Ref.                      |                   |
|                                                  | Yes, but not continuously | 0.48 (0.34 - 0.69)        | <b>&lt; 0.001</b> | 0.7 (0.37 - 1.33)         | 0.272        | 0.99 (0.4 - 2.42)         | 0.977             |
|                                                  | Never                     | 0.4 (0.27 - 0.59)         | <b>&lt; 0.001</b> | 0.68 (0.34 - 1.34)        | 0.265        | 0.75 (0.29 - 1.99)        | 0.561             |
| Chlamydia                                        | Negative                  | Ref.                      |                   | Ref.                      |              | Ref.                      |                   |
|                                                  | Positive                  | <b>1.93 (1.46 - 2.56)</b> | <b>&lt; 0.001</b> | <b>2.17 (1.39 - 3.39)</b> | <b>0.001</b> | <b>2.82 (1.59 - 4.98)</b> | <b>0.001</b>      |
| Condom use with casual partners (last 12 months) | Always                    | Ref.                      |                   | Ref.                      |              | Ref.                      |                   |
|                                                  | Sometimes                 | 0.99 (0.74 - 1.34)        | 0.960             | 1.12 (0.69 - 1.83)        | 0.645        | 1.42 (0.75 - 2.66)        | 0.273             |
|                                                  | Never/not often           | 1.51 (0.94 - 2.45)        | 0.090             | 0.64 (0.19 - 2.12)        | 0.464        | 1.97 (0.72 - 5.4)         | 0.181             |
|                                                  | No casual partners        | 0.81 (0.53 - 1.24)        | 0.326             | 1.81 (1.04 - 3.16)        | 0.036        | 1.22 (0.5 - 2.96)         | 0.65              |

**Table S12** - Risk estimates for confounders included in final multivariable models

|                                          |               | Multivariable cox models |             |         |
|------------------------------------------|---------------|--------------------------|-------------|---------|
|                                          | Categories    | aHR                      | 95% CI      | p-value |
| Pelvic inflammatory disease <sup>a</sup> |               |                          |             |         |
| Chlamydia                                | Negative      | Ref.                     |             |         |
|                                          | Positive      | 1.62                     | 1.20 – 2.17 | 0.001   |
| Age                                      | Linear        | 0.93                     | 0.87 – 0.99 | 0.03    |
| Education                                | Practical     | Ref.                     |             |         |
|                                          | Theoretical   | 0.45                     | 0.34 – 0.59 | < 0.001 |
| Number of lifetime chlamydia tests       | 1 - 2         | Ref.                     |             |         |
|                                          | 3 - 5         | 1.20                     | 0.86 – 1.68 | 0.27    |
|                                          | 6 or more     | 1.32                     | 0.96 – 1.82 | 0.09    |
| Ectopic pregnancy <sup>b</sup>           |               |                          |             |         |
| Chlamydia                                | Negative      | Ref.                     |             |         |
|                                          | Positive      | 1.84                     | 1.14 – 2.95 | 0.012   |
| Age                                      | Linear        | 1.05                     | 0.96 – 1.15 | 0.29    |
| Migration background                     | Non-western   | Ref.                     |             |         |
|                                          | Western       | 0.54                     | 0.33 – 0.89 | 0.02    |
| Education                                | Practical     | Ref.                     |             |         |
|                                          | Theoretical   | 0.48                     | 0.31 – 0.77 | < 0.001 |
| Number of lifetime chlamydia tests       | 1 - 2         | Ref.                     |             |         |
|                                          | 3 - 5         | 0.98                     | 0.58 – 1.65 | 0.94    |
|                                          | 6 or more     | 0.83                     | 0.47 – 1.46 | 0.52    |
| Number of lifetime sex partners          | <6            | Ref.                     |             |         |
|                                          | 6 -12         | 0.82                     | 0.45 – 1.48 | 0.50    |
|                                          | >12           | 0.50                     | 0.26 – 0.95 | 0.03    |
| IUD use                                  | Never         | Ref.                     |             |         |
|                                          | At least once | 1.15                     | 0.74 – 1.78 | 0.52    |
| Tubal factor infertility <sup>c</sup>    |               |                          |             |         |
| Chlamydia                                | Negative      | Ref.                     |             |         |
|                                          | Positive      | 2.75                     | 1.53 – 4.94 | 0.001   |
| Age                                      | Linear        | 1.01                     | 0.89 – 1.15 | 0.88    |

|                                    |           |      |             |      |
|------------------------------------|-----------|------|-------------|------|
| Number of lifetime chlamydia tests | 1 - 2     | Ref. |             |      |
|                                    | 3 - 5     | 1.68 | 0.85 – 3.30 | 0.13 |
|                                    | 6 or more | 1.18 | 0.58 – 2.40 | 0.64 |

---
